# Supplementary material
Source: PubMed Central journal article supplement (PMC7669708)
Supplement: NIHMS1604472-supplement-Supp_info.pdf [file NIHMS1604472-supplement-Supp_info.pdf]

### A) ALT (U/L)

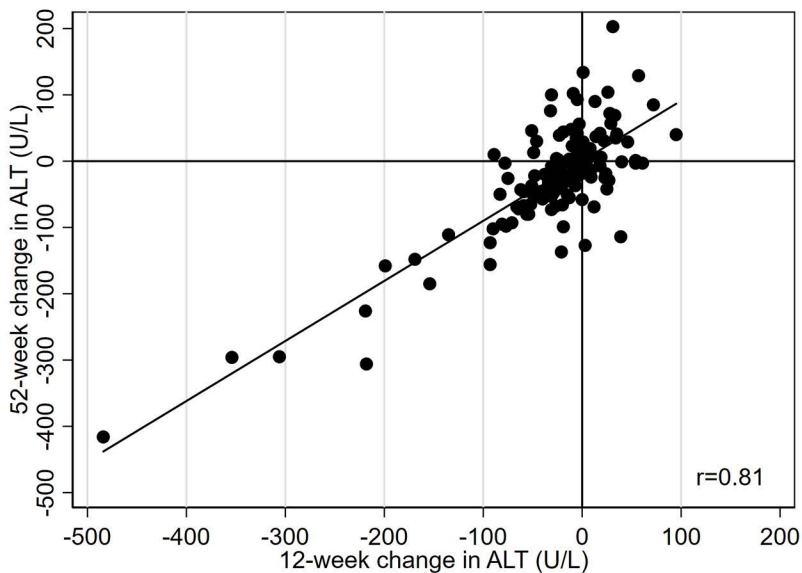

### B) AST (U/L)

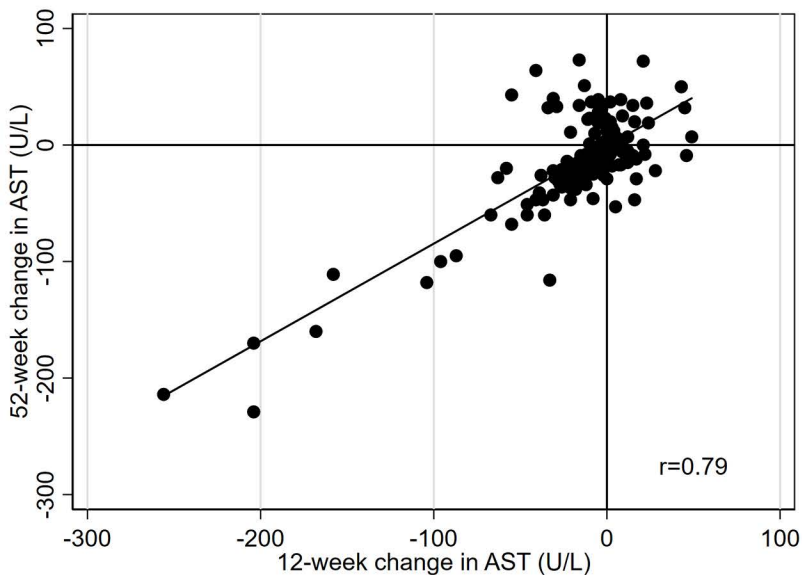

### C) GGT (U/L)

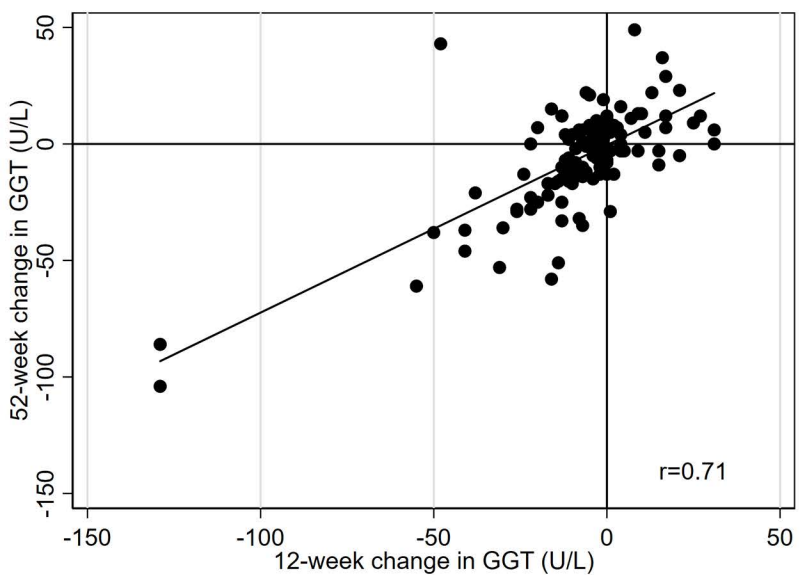

A)

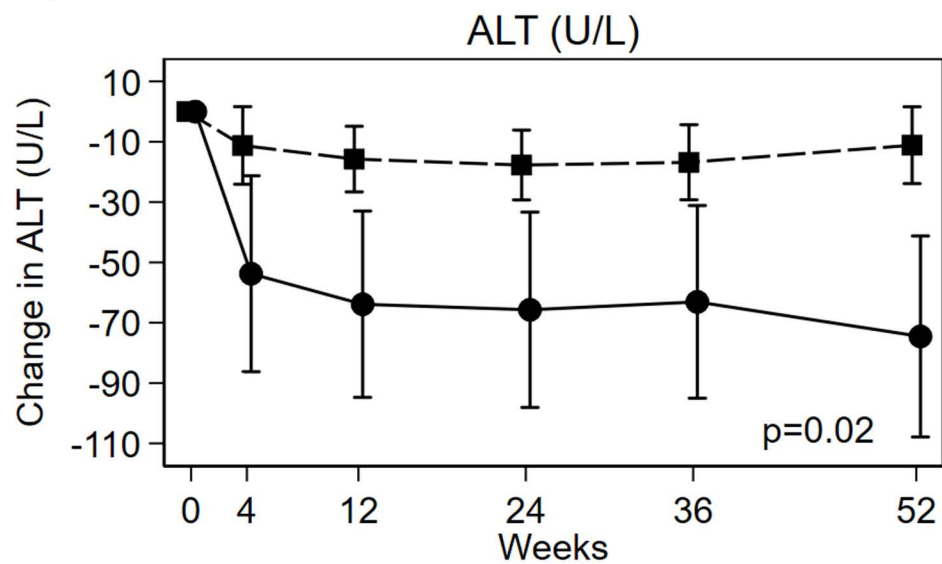

B)

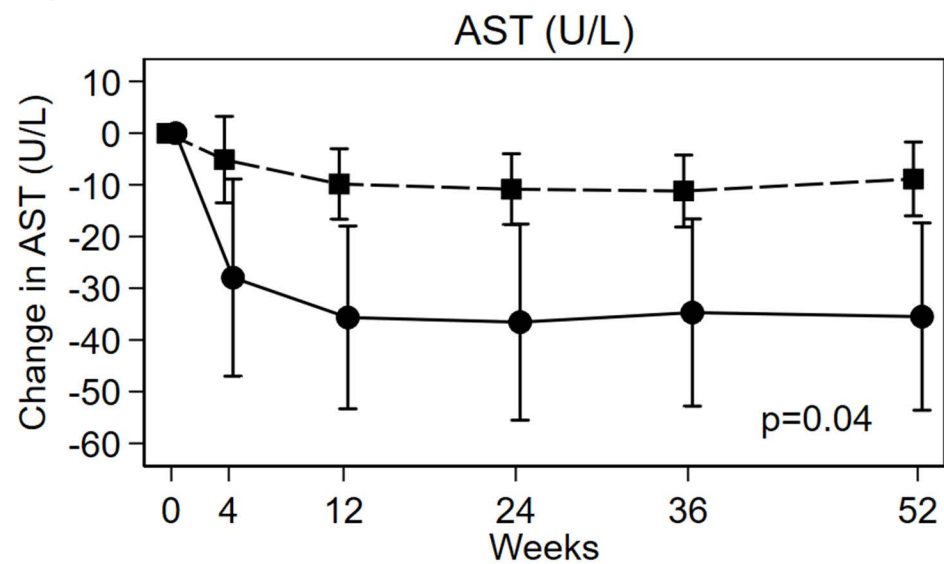

C)

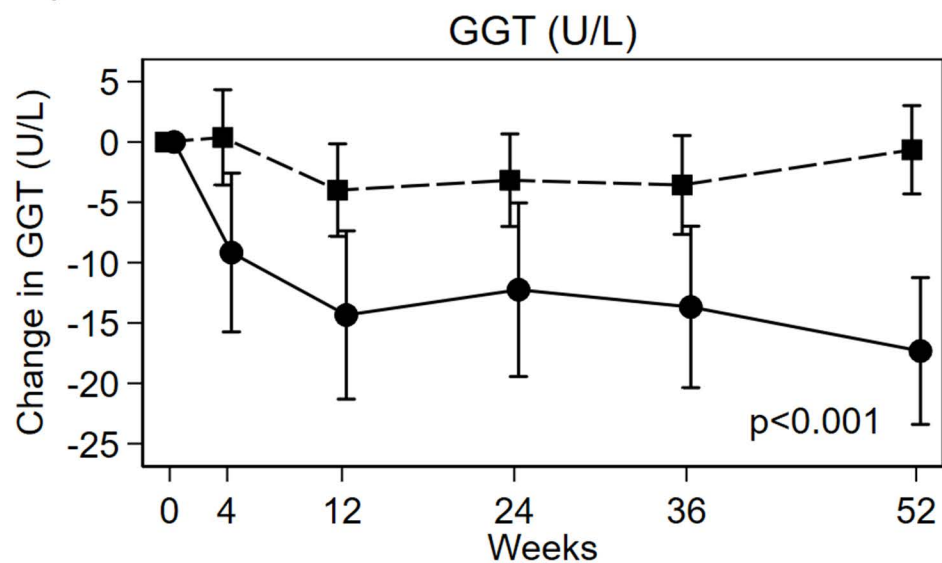

—●— Histologic Responder

—■— Histologic Non-Responder

A)

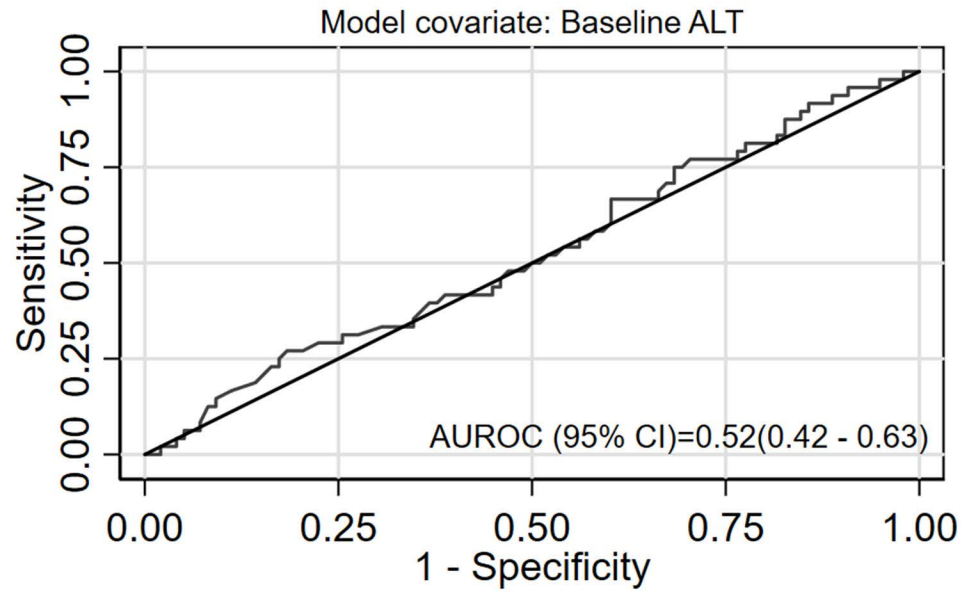

B)

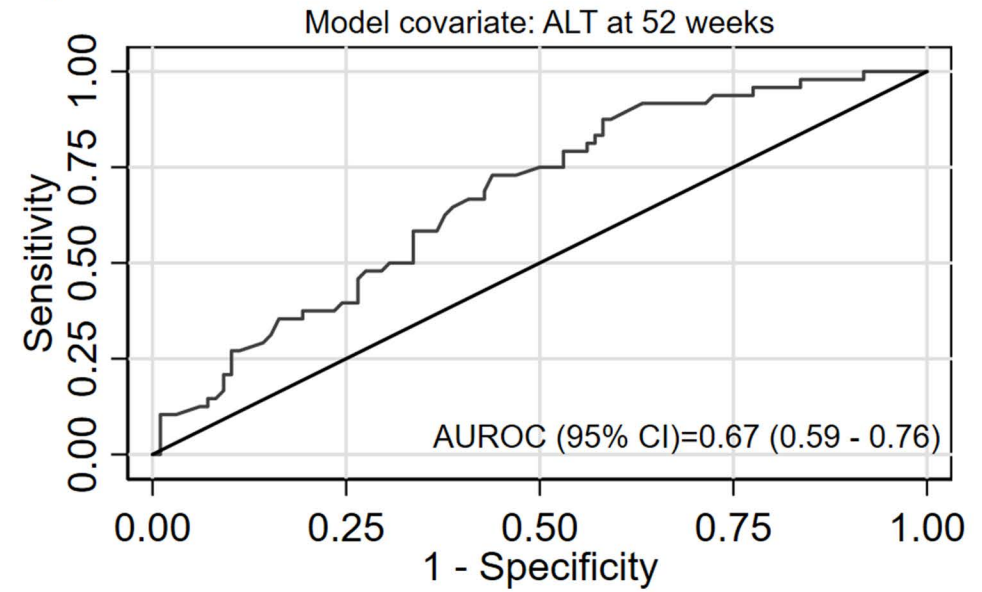

C)

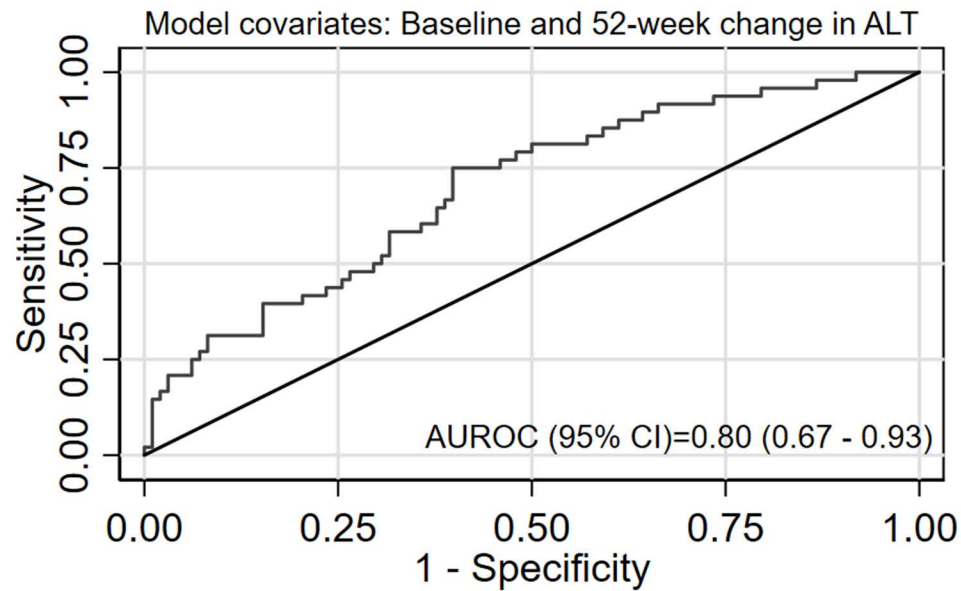

D)

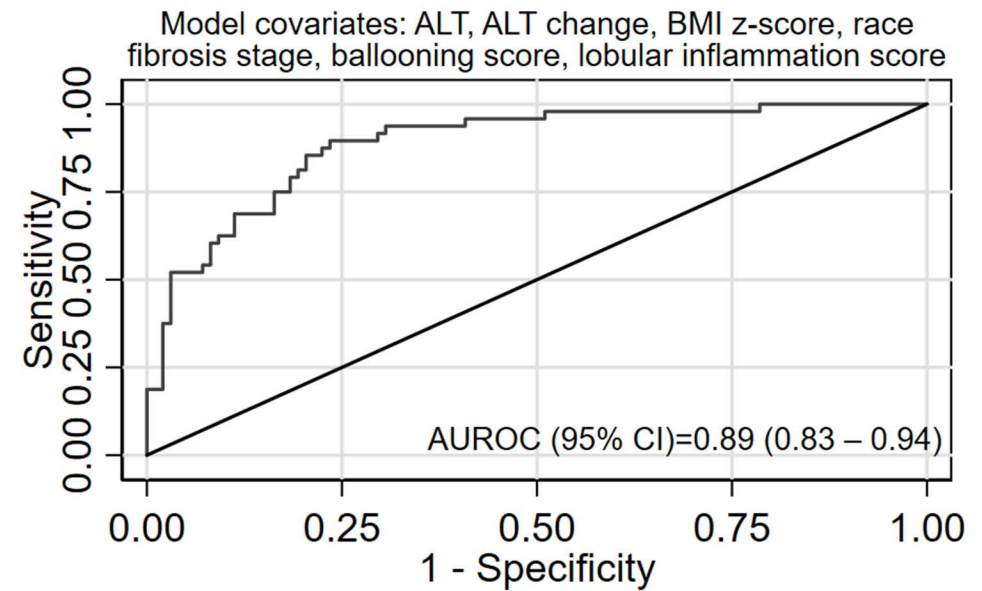

**Supplemental Table 1. Baseline characteristics of CyNCh patients with baseline and end of treatment biopsies**

|                                           | <b>CBDR<br/>(N=71)</b> | <b>Placebo<br/>(N=75)</b> | <b>Total<br/>(N=146)</b> | <b>P</b> |
|-------------------------------------------|------------------------|---------------------------|--------------------------|----------|
| <b>Demographics</b>                       |                        |                           |                          |          |
| Age (years)                               | 13.6 (2.8)             | 13.6 (2.5)                | 13.6 (2.6)               | 0.98     |
| Male                                      | 52 (73%)               | 51 (68%)                  | 103 (71%)                | 0.59     |
| Race                                      |                        |                           |                          | 0.92     |
| White                                     | 43 (61%)               | 43 (57%)                  | 86 (59%)                 |          |
| Non-white                                 | 10 (14%)               | 12 (16%)                  | 22 (15%)                 |          |
| Refusal/not stated                        | 18 (25%)               | 20 (27%)                  | 38 (26%)                 |          |
| Hispanic ethnicity                        | 56 (79%)               | 52 (69%)                  | 108 (74%)                | 0.26     |
| <b>Weight stratum</b>                     |                        |                           |                          |          |
| ≤65 kg                                    | 21 (30%)               | 21 (28%)                  | 42 (29%)                 | 0.97     |
| >65-80 kg                                 | 9 (13%)                | 9 (12%)                   | 18 (12%)                 |          |
| >80 kg                                    | 41 (58%)               | 45 (60%)                  | 86 (59%)                 |          |
| <b>Liver chemistries – median (IQR)</b>   |                        |                           |                          |          |
| Alanine aminotransferase (U/L)            | 92 (67-161)            | 83 (57-122)               | 86 (62-140)              | 0.18     |
| Aspartate aminotransferase (U/L)          | 54 (40-91)             | 49 (36-71)                | 51 (38-79)               | 0.43     |
| γ-glutamyl transpeptidase (U/L)           | 37 (26-65)             | 34 (27-51)                | 35 (27-60)               | 0.39     |
| <b>Metabolic factors</b>                  |                        |                           |                          |          |
| Weight (kg)                               | 84 (26)                | 84 (25)                   | 84 (26)                  | 0.98     |
| Body-mass index (kg/m <sup>2</sup> )      | 32 (7)                 | 32 (6)                    | 32 (6)                   | 0.79     |
| Body-mass index z-score                   | 2.2 (0.5)              | 2.2 (0.4)                 | 2.2 (0.4)                | 0.54     |
| <b>Liver histology findings</b>           |                        |                           |                          |          |
| NAFLD activity score <sup>*</sup>         | 4.7 (1.3)              | 4.6 (1.4)                 | 4.7 (1.4)                | 0.87     |
| Steatosis score                           | 2.3 (0.8)              | 2.5 (0.7)                 | 2.4 (0.7)                | 0.13     |
| Lobular inflammation score                | 1.8 (0.7)              | 1.6 (0.7)                 | 1.7 (0.7)                | 0.06     |
| Hepatocellular ballooning score           | 0.6 (0.7)              | 0.6 (0.8)                 | 0.6 (0.7)                | 0.96     |
| Portal inflammation score <sup>†</sup>    | 1.1 (0.5)              | 1.1 (0.5)                 | 1.1 (0.5)                | 0.95     |
| Fibrosis stage                            |                        |                           |                          | 0.83     |
| 0, none                                   | 21 (30%)               | 24 (32%)                  | 45 (31%)                 |          |
| 1a, mild, zone 3 perisinusoidal           | 5 (7%)                 | 6 (8%)                    | 11 (8%)                  |          |
| 1b, moderate, zone 3 perisinusoidal       | 4 (6%)                 | 5 (7%)                    | 9 (6%)                   |          |
| 1c, portal/periportal only                | 18 (25%)               | 19 (25%)                  | 37 (25%)                 |          |
| 2, zone 3 and periportal, any combination | 7 (10%)                | 11 (15%)                  | 18 (12%)                 |          |
| 3, bridging                               | 15 (21%)               | 10 (13%)                  | 25 (17%)                 |          |
| 4, cirrhosis                              | 1 (1%)                 | 0 (0%)                    | 1 (1%)                   |          |
| Steatohepatitis                           |                        |                           |                          | 0.43     |
| No                                        | 22 (31%)               | 18 (24%)                  | 40 (27%)                 |          |
| Borderline Zone 3 pattern                 | 13 (18%)               | 9 (12%)                   | 22 (15%)                 |          |
| Borderline Zone 1 pattern                 | 19 (27%)               | 27 (36%)                  | 46 (32%)                 |          |
| Definite                                  | 17 (24%)               | 21 (28%)                  | 38 (26%)                 |          |
| Resolution of Borderline Zone 1 pattern   | 9 (47%)                | 10 (37%)                  | 19 (41%)                 | 0.55     |

Data are n (%) or mean (SD), unless otherwise noted.

\* NAFLD activity score was assessed on a scale of 0-8, with higher scores showing more severe disease (the components of this measure are steatosis [assessed on a scale of 0-3], lobular inflammation [assessed on a scale of 0-3], and hepatocellular ballooning [assessed on a scale of 0-2]).

† Portal inflammation was assessed on a scale of 0-2, with higher scores showing more severe inflammation.

**Supplemental Table 2. ALT, AST, and GGT at baseline, 52-weeks, and change from baseline, by histologic response**

|                         | <b>Histologic Responder<br/>(N=43)</b> | <b>Histologic Non-responder<br/>(N=103)</b> | <b>P*</b> |
|-------------------------|----------------------------------------|---------------------------------------------|-----------|
| <b>ALT (U/L)</b>        |                                        |                                             |           |
| Baseline                |                                        |                                             |           |
| Geometric mean (95% CI) | 105 (82, 135)                          | 90 (81, 101)                                | 0.53      |
| Min, Max                | 18, 522                                | 24, 499                                     |           |
| 52-weeks                |                                        |                                             |           |
| Geometric mean (95% CI) | 44 (32, 59)                            | 77 (67, 87)                                 | <0.001    |
| Min, Max                | 7, 374                                 | 16, 341                                     |           |
| Change from baseline    |                                        |                                             |           |
| Mean (95% CI)           | -75 (-108, -41)                        | -11 (-24, 2))                               | <0.001    |
| Min, max                | -416, 104                              | -296, 203                                   |           |
| <b>AST (U/L)</b>        |                                        |                                             |           |
| Baseline                |                                        |                                             |           |
| Geometric mean (95% CI) | 62 (51, 76)                            | 54 (48, 59)                                 | 0.67      |
| Min, Max                | 19, 330                                | 13, 280                                     |           |
| 52-weeks                |                                        |                                             |           |
| Geometric mean (95% CI) | 33 (26, 41)                            | 44 (39, 49)                                 | <0.001    |
| Min, Max                | 11, 221                                | 15, 234                                     |           |
| Change from baseline    |                                        |                                             |           |
| Mean (95% CI)           | -35 (-54, -17)                         | -9 (-16, -2)                                | <0.001    |
| Min, max                | -229, 64                               | -170, 73                                    |           |
| <b>GGT (U/L)</b>        |                                        |                                             |           |
| Baseline                |                                        |                                             |           |
| Geometric mean (95% CI) | 41 (34, 48)                            | 39 (35, 43)                                 | 0.30      |
| Min, Max                | 13, 147                                | 17, 224                                     |           |
| 52-weeks                |                                        |                                             |           |
| Geometric mean (95% CI) | 26 (22, 31)                            | 37 (33, 42)                                 | <0.001    |
| Min, Max                | 9, 76                                  | 11, 202                                     |           |
| Change from baseline    |                                        |                                             |           |
| Mean (95% CI)           | -17 (-23, -11)                         | -1 (-4, 3)                                  | <0.001    |
| Min, max                | -104, 6                                | -86, 49                                     |           |

\* P-values determined from ANCOVA models, regressing laboratory measure (ALT, AST, GGT) on histologic response, using robust regression to down weight outliers. 52-week values and change from baseline values were adjusted for the laboratory value at baseline.

**Supplemental Table 3. Changes in liver chemistries over time by histologic improvement and treatment group**

| Change from baseline –<br>Adjusted means (95% CI) | Cysteamine         |                           |        | Placebo            |                           |       | Inter-<br>action<br>P |
|---------------------------------------------------|--------------------|---------------------------|--------|--------------------|---------------------------|-------|-----------------------|
|                                                   | Improved<br>(N=25) | Not<br>improved<br>(N=46) | P      | Improved<br>(N=18) | Not<br>improved<br>(N=57) | P     |                       |
| <b>ALT (U/L)</b>                                  |                    |                           |        |                    |                           |       |                       |
| 4 weeks                                           | -67<br>(-91, -44)  | -34<br>(-52, -17)         | 0.03   | -15<br>(-46, 15)   | +2<br>(-16, 19)           | 0.34  | 0.19                  |
| 12 weeks                                          | -71<br>(-95, -47)  | -44<br>(-63, -26)         | 0.09   | -35<br>(-53, -16)  | -1<br>(-11, 10)           | 0.003 | 0.78                  |
| 24 weeks                                          | -70<br>(-94, -46)  | -46<br>(-64, -27)         | 0.12   | -37<br>(-60, -14)  | -3<br>(-15, 10)           | 0.01  | 0.69                  |
| 36 weeks                                          | -77<br>(-99, -55)  | -43<br>(-59, -26)         | 0.02   | -28<br>(-52, -5)   | -2<br>(-15, 12)           | 0.05  | 0.50                  |
| 52 weeks                                          | -81<br>(-103, -59) | -36<br>(-53, -20)         | 0.002  | -35<br>(-65, -5)   | -1<br>(-17, 16)           | 0.06  | 0.70                  |
| <b>AST (U/L)</b>                                  |                    |                           |        |                    |                           |       |                       |
| 4 weeks                                           | -37<br>(-52, -21)  | -18<br>(-30, -7)          | 0.06   | -7<br>(-25, 12)    | +3<br>(-8, 14)            | 0.38  | 0.26                  |
| 12 weeks                                          | -40<br>(-52, -27)  | -28<br>(-37, -19)         | 0.13   | -19<br>(-29, -9)   | 0<br>(-6, 6)              | 0.002 | 0.57                  |
| 24 weeks                                          | -40<br>(-54, -25)  | -27<br>(-38, -15)         | 0.16   | -21<br>(-34, -7)   | -2<br>(-9, 5)             | 0.02  | 0.74                  |
| 36 weeks                                          | -44<br>(-54, -34)  | -26<br>(-34, -19)         | 0.006  | -13<br>(-26, 1)    | -2<br>(-10, 5)            | 0.17  | 0.33                  |
| 52 weeks                                          | -42<br>(-55, -29)  | -24<br>(-33, -14)         | 0.03   | -13<br>(-29, 3)    | -1<br>(-10, 8)            | 0.19  | 0.50                  |
| <b>GGT (U/L)</b>                                  |                    |                           |        |                    |                           |       |                       |
| 4 weeks                                           | -11<br>(-21, -1)   | +1<br>(-6, 9)             | 0.06   | -6<br>(-13, 0)     | -1<br>(-4, 3)             | 0.11  | 0.40                  |
| 12 weeks                                          | -17<br>(-23, -10)  | -9<br>(-14, -4)           | 0.08   | -10<br>(-16, -4)   | -1<br>(-4, 3)             | 0.01  | 0.71                  |
| 24 weeks                                          | -16<br>(-24, -8)   | -5<br>(-11, 1)            | 0.03   | -5<br>(-11, 2)     | -2<br>(-5, 2)             | 0.44  | 0.25                  |
| 36 weeks                                          | -17<br>(-25, -10)  | -8<br>(-13, -3)           | 0.03   | -8<br>(-14, -2)    | 0<br>(-4, 3)              | 0.04  | 0.80                  |
| 52 weeks                                          | -20<br>(-26, -14)  | -5<br>(-9, -1)            | <0.001 | -12<br>(-19, -4)   | +2<br>(-2, 6)             | 0.002 | 0.81                  |

\*P-values derived from ANCOVA, regressing the change in liver chemistry on histologic improvement and the baseline value of the liver chemistry.

**Supplemental Table 4. Association between 12-week change in ALT and 52-week change in ALT**

|                                                           | $\beta$ | 95% CI     | P      |
|-----------------------------------------------------------|---------|------------|--------|
| <b>Outcome: <math>\Delta</math> ALT (52-week-BL, U/L)</b> |         |            |        |
| 12-week change in ALT                                     | 0.9     | 0.8, 1.0   | <0.001 |
| Treatment group (Cyst vs. Plbo)                           | -8.1    | -25.3, 9.2 | 0.36   |
| Intercept                                                 | 3.8     |            |        |
| <b>Outcome: <math>\Delta</math> AST (52-week-BL, U/L)</b> |         |            |        |
| 12-week change in AST                                     | 0.8     | 0.7, 0.9   | <0.001 |
| Treatment group (Cyst vs. Plbo)                           | -6.0    | -16.0, 4.0 | 0.24   |
| Intercept                                                 | 1.5     |            |        |
| <b>Outcome: <math>\Delta</math> GGT (52-week-BL, U/L)</b> |         |            |        |
| 12-week change in GGT                                     | 0.7     | 0.6, 0.8   | <0.001 |
| Treatment group (Cyst vs. Plbo)                           | -4.0    | -9.0, 1.1  | 0.12   |
| Intercept                                                 | 1.3     |            |        |

\* Treatment group\*12-week change in liver chemistry interaction p-value: ALT P=0.69; AST P=0.19; GGT P=0.07.



**Supplemental Table 5. Logistic regression analysis of histologic improvement on liver chemistries (ALT, AST, and GGT)**

| <b>Outcome: Histologic Improvement</b>                                                                                        | <b>Odds ratio</b> | <b>95% CI</b> | <b>P</b> |
|-------------------------------------------------------------------------------------------------------------------------------|-------------------|---------------|----------|
| <b>MODEL 0: Univariable logistic regression models</b>                                                                        |                   |               |          |
| Baseline (per 10 U/L increase)                                                                                                |                   |               |          |
| ALT (U/L)                                                                                                                     | 1.04              | 1.00 – 1.07   | 0.04     |
| AST (U/L)                                                                                                                     | 1.06              | 0.99 – 1.13   | 0.07     |
| GGT (U/L)                                                                                                                     | 1.02              | 0.91 – 1.14   | 0.73     |
| Change (per 10 U/L decrease from baseline to 52 weeks)                                                                        |                   |               |          |
| Δ ALT (U/L)                                                                                                                   | 1.10              | 1.04 – 1.17   | <0.001   |
| Δ AST (U/L)                                                                                                                   | 1.14              | 1.04 – 1.24   | 0.004    |
| Δ GGT (U/L)                                                                                                                   | 1.60              | 1.26 – 2.03   | <0.001   |
| <b>MODEL 1: Multivariable logistic regression of baseline ALT, AST, GGT, and 52-week changes</b>                              |                   |               |          |
| Baseline (per 10 U/L increase)                                                                                                |                   |               |          |
| ALT (U/L)                                                                                                                     | 0.99              | 0.82 – 1.21   |          |
| AST (U/L)                                                                                                                     | 1.03              | 0.71 – 1.49   |          |
| GGT (U/L)                                                                                                                     | 0.75              | 0.56 – 1.00   |          |
| Change (per 10 U/L decrease from baseline to 52 weeks)                                                                        |                   |               |          |
| Δ ALT (U/L)                                                                                                                   | 1.12              | 0.90 – 1.40   |          |
| Δ AST (U/L)                                                                                                                   | 0.86              | 0.62 – 1.20   |          |
| Δ GGT (U/L)                                                                                                                   | 1.88              | 1.16 – 3.04   |          |
| Intercept                                                                                                                     | 0.66              | 0.29 – 1.54   |          |
| P for baseline ALT, Δ ALT (2 d.f.):                                                                                           |                   |               | 0.44     |
| P for baseline AST, Δ AST (2 d.f.):                                                                                           |                   |               | 0.56     |
| P for baseline GGT, Δ GGT (2 d.f.):                                                                                           |                   |               | 0.04     |
| P for baseline and Δ for ALT, AST, GGT (6 d.f.):                                                                              |                   |               | <0.0001  |
| <b>MODEL 2: Best AIC model from candidate set: baseline ALT, AST, GGT, and 52-week changes</b>                                |                   |               |          |
| Baseline GGT (per 10 U/L increase)                                                                                            | 0.74              | 0.60 – 0.91   | 0.005    |
| Δ GGT (per 10 U/L decrease from baseline to 52 weeks)                                                                         | 2.22              | 1.54 – 3.21   | <0.0001  |
| P for baseline and Δ GGT                                                                                                      |                   |               | <0.0001  |
| <b>Model 3: Best AIC model from all possible subsets of 24 candidate variables, added to Model 2 variables (GGT and ΔGGT)</b> |                   |               |          |
| Baseline GGT (per 10 U/L increase)                                                                                            | 0.55              | 0.40 – 0.77   | <0.001   |
| Δ GGT (per 10 U/L decrease from baseline to 52 weeks)                                                                         | 2.25              | 1.45 – 3.50   | <0.001   |
| Baseline lobular inflammation                                                                                                 | 6.31              | 2.70 – 14.74  | <0.001   |
| Baseline alkaline phosphatase (per 10 U/L increase)                                                                           | 1.08              | 1.02 – 1.15   | 0.01     |
| Baseline LDL (per 10 mg/dL increase)                                                                                          | 1.19              | 1.01 – 1.42   | 0.04     |
| Hypertension at baseline                                                                                                      | 4.37              | 0.97 – 19.66  | 0.05     |
| Age (years)                                                                                                                   | 1.22              | 0.96 – 1.56   | 0.11     |

|                                                                                                                               |              |               |          |
|-------------------------------------------------------------------------------------------------------------------------------|--------------|---------------|----------|
| Full model P:                                                                                                                 |              |               | <0.0001  |
|                                                                                                                               |              |               |          |
| <b>Comparison of Models</b>                                                                                                   | <b>AUROC</b> | <b>95% CI</b> | <b>P</b> |
| Model 2: Baseline GGT, $\Delta$ GGT                                                                                           | 0.79         | 0.71 – 0.87   |          |
| Model 3: Baseline GGT, $\Delta$ GGT, lobular inflammation, alkaline phosphatase (U/L), LDL (mg/dL), hypertension, age (years) | 0.89         | 0.82 – 0.95   |          |
| P-value: Model 3 vs. Model 2                                                                                                  |              |               | 0.01     |

April 30, 2020

**]Supplemental Table 6. Logistic regression analysis of resolution of Zone 1, periportal pattern on liver chemistries (ALT, AST, and GGT)**

| <b>Outcome: Resolution of borderline Zone 1 steatohepatitis</b>                                                               | <b>Odds ratio</b> | <b>95% CI</b> | <b>P</b> |
|-------------------------------------------------------------------------------------------------------------------------------|-------------------|---------------|----------|
| <b>MODEL 0: Univariable logistic regression models</b>                                                                        |                   |               |          |
| Baseline (per 10 U/L increase)                                                                                                |                   |               |          |
| ALT (U/L)                                                                                                                     | 0.91              | 0.80 – 1.04   | 0.16     |
| AST (U/L)                                                                                                                     | 0.84              | 0.66 – 1.07   | 0.16     |
| GGT (U/L)                                                                                                                     | 0.72              | 0.54 – 0.96   | 0.02     |
| Change (per 10 U/L decrease from baseline to 52 weeks)                                                                        |                   |               |          |
| Δ ALT (U/L)                                                                                                                   | 1.13              | 1.01 – 1.27   | 0.04     |
| Δ AST (U/L)                                                                                                                   | 1.20              | 0.97 – 1.48   | 0.09     |
| Δ GGT (U/L)                                                                                                                   | 1.11              | 0.85 – 1.45   | 0.43     |
| <b>MODEL 1: Multivariable logistic regression of baseline ALT, AST, GGT, and 52-week changes</b>                              |                   |               |          |
| Baseline (per 10 U/L increase)                                                                                                |                   |               |          |
| ALT (U/L)                                                                                                                     | 0.67              | 0.38 – 1.17   |          |
| AST (U/L)                                                                                                                     | 1.51              | 0.55 – 4.16   |          |
| GGT (U/L)                                                                                                                     | 0.79              | 0.48 – 1.30   |          |
| Change (per 10 U/L decrease from baseline to 52 weeks)                                                                        |                   |               |          |
| Δ ALT (U/L)                                                                                                                   | 1.73              | 0.97 – 3.11   |          |
| Δ AST (U/L)                                                                                                                   | 0.56              | 0.21 – 1.54   |          |
| Δ GGT (U/L)                                                                                                                   | 1.01              | 0.53 – 1.93   |          |
| Intercept                                                                                                                     | 4.97              | 0.60 – 41.36  |          |
| P for Δ ALT, Δ AST, Δ GGT (3 d.f.):                                                                                           |                   |               | 0.07     |
| P for baseline ALT, Δ ALT (2 d.f.):                                                                                           |                   |               | 0.18     |
| P for baseline AST, Δ AST (2 d.f.):                                                                                           |                   |               | 0.52     |
| P for baseline GGT, Δ GGT (2 d.f.):                                                                                           |                   |               | 0.60     |
| Full model P:                                                                                                                 |                   |               | 0.007    |
| <b>MODEL 2: Best AIC model from candidate set: baseline ALT, AST, GGT, and 52-week changes</b>                                |                   |               |          |
| Baseline ALT (per 10 U/L increase)                                                                                            | 0.71              | 0.55 – 0.92   | 0.009    |
| Δ ALT (per 10 U/L decrease from baseline to 52 weeks)                                                                         | 1.38              | 1.10 – 1.74   | 0.006    |
| Full model P:                                                                                                                 |                   |               | 0.0004   |
| <b>Model 3: Best AIC model from all possible subsets of 24 candidate variables, added to Model 2 variables (ALT and ΔALT)</b> |                   |               |          |
| Baseline ALT (per 10 U/L increase)                                                                                            | 0.60              | 0.40 – 0.90   | 0.01     |
| Δ ALT (per 10 U/L decrease from baseline to 52 weeks)                                                                         | 2.03              | 1.27 – 3.25   | 0.003    |
| LDL (mg/dL)                                                                                                                   | 0.94              | 0.90 – 0.99   | 0.008    |
| White vs. non-white                                                                                                           | 22.20             | 1.60 – 307.39 | 0.02     |
| Full model P:                                                                                                                 |                   |               | <0.0001  |

| <b>Comparison of Models</b>                                  | <b>AUROC</b> | <b>95% CI</b> | <b>P</b> |
|--------------------------------------------------------------|--------------|---------------|----------|
| Model 2: Baseline ALT, $\Delta$ ALT                          | 0.80         | 0.67 – 0.93   |          |
| Model 3: Baseline ALT, $\Delta$ ALT, LDL (mg/dL), white race | 0.91         | 0.83 – 0.99   |          |
| P-value: Model 3 vs. Model 2                                 |              |               | 0.03     |
